# Supplementary material for: Three-Dimensional Vanadium and Nitrogen Dual-Doped Ti3C2 Film with Ultra-High Specific Capacitance and High Volumetric Energy Density for Zinc-Ion Hybrid Capacitors
Source: MDPI journal article supplement (doi:10.3390/nano14060490), 2024-03-08
Supplement: s1 [file s1]

## **Supplementary Materials**

### **Three Dimensional Vanadium and Nitrogen Dual-Doped Ti<sub>3</sub>C<sub>2</sub> Film with Ultra-high Specific Capacitance and High Volume Energy Density For Zinc Ion Hybrid Capacitors**

**Xinhui Jin, Siliang Yue, Jiangcheng Zhang, Liang Qian, Xiaohui Guo\***

Key Lab of Synthetic and Natural Functional Molecule Chemistry of Ministry of Education, The College of Chemistry and Materials Science, Northwest University, Xi'an 710069, P. R. China.

\* Correspondence: guoxh2009@nwu.edu.cn

### ***Characterization***

The morphology of the samples was studied by field emission scanning electron microscopy (FE-SEM, Hitachi SU8010, Japan) and transmission electron microscopy (FEI Talos F200X, USA). The crystalline phases of the obtained products were characterized by X-ray diffraction on a Bruker D8 Advance (Bremen, Germany). The surface chemical compositions were analyzed by X-ray photoelectron spectroscopy (PHI5000 Versa Probe III, Japan). Nitrogen absorption/desorption isotherms of the samples were obtained at -196 °C using the Brunauer-Emmett-Teller (BET) method, and the samples were outgassed under vacuum for 6 h at 150 °C.

### ***Electrochemical measurements***

The electrochemical performance of all film electrodes was characterized by employing a two-electrode system with Zn foil as counter electrode and 2 M ZnSO<sub>4</sub> as electrolyte. The CHI 760E workstation was used to collect cyclic voltammogram (CV), electrochemical impedance spectroscopy (EIS), and galvanostatic charge/discharge curves (GCD). Equation (1) was used to calculate the specific capacitances ( $C_m$ ) of active materials from the galvanostatic charge/discharge curves:

$$C_m = \frac{I \times \Delta t}{m \times \Delta V} \quad (1)$$

where  $I$  is the discharge current,  $m$  is the mass of active materials,  $\Delta t$  is the discharge time, and  $\Delta V$  is the working voltage range.

The energy density ( $E$ ) and power density ( $P$ ) were calculated using the following equations:

$$E = \frac{1}{2 \times 3.6} C_m V^2 \quad (2)$$

$$P = \frac{E \times 3600}{\Delta t} \quad (3)$$

where  $C_m$  is the capacitance of film electrode,  $\Delta t$  is the discharge time,  $V$  is the operation potential window.

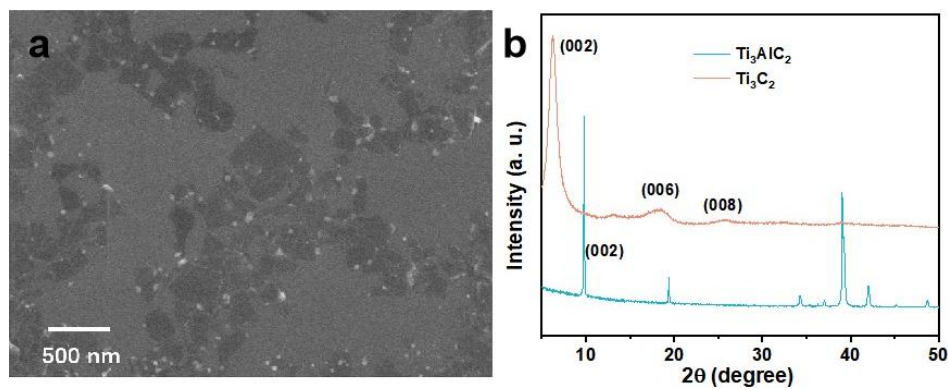

**Figure S1.** (a) SEM image few-layered  $\text{Ti}_3\text{C}_2\text{T}_x$  nanosheets, (b) XRD of  $\text{Ti}_3\text{AlC}_2$  and  $\text{Ti}_3\text{C}_2\text{T}_x$ .

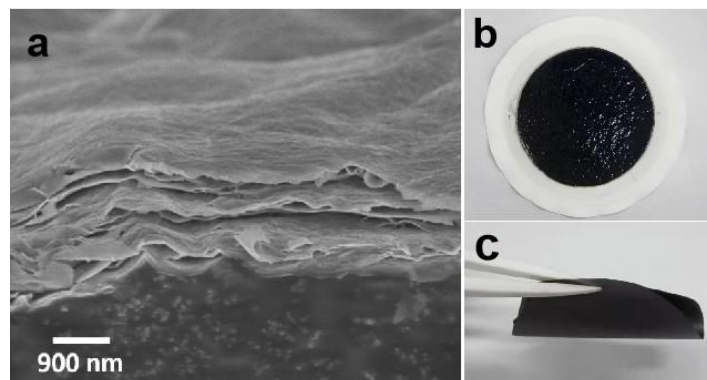

**Figure S2.** (a) SEM cross-sectional images, (b-c) the optical figures of  $\text{Ti}_3\text{C}_2$  film.

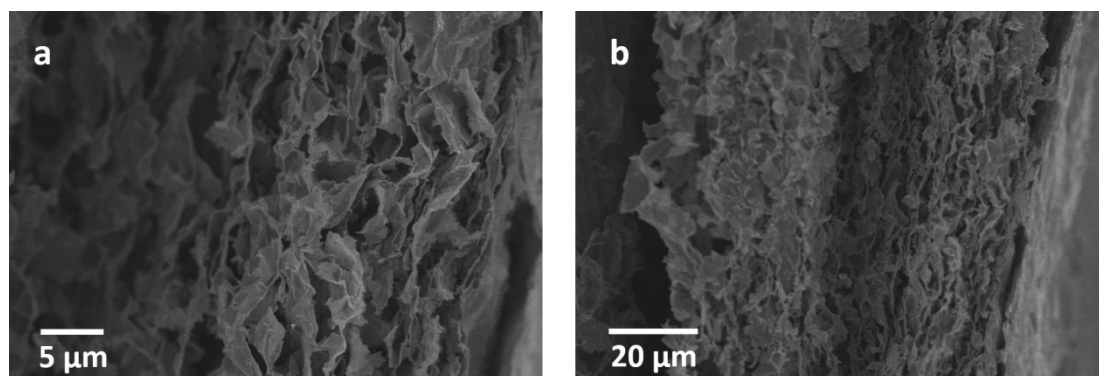

**Figure S3.** SEM cross-sectional images of 3D  $\text{Ti}_3\text{C}_2$  film.

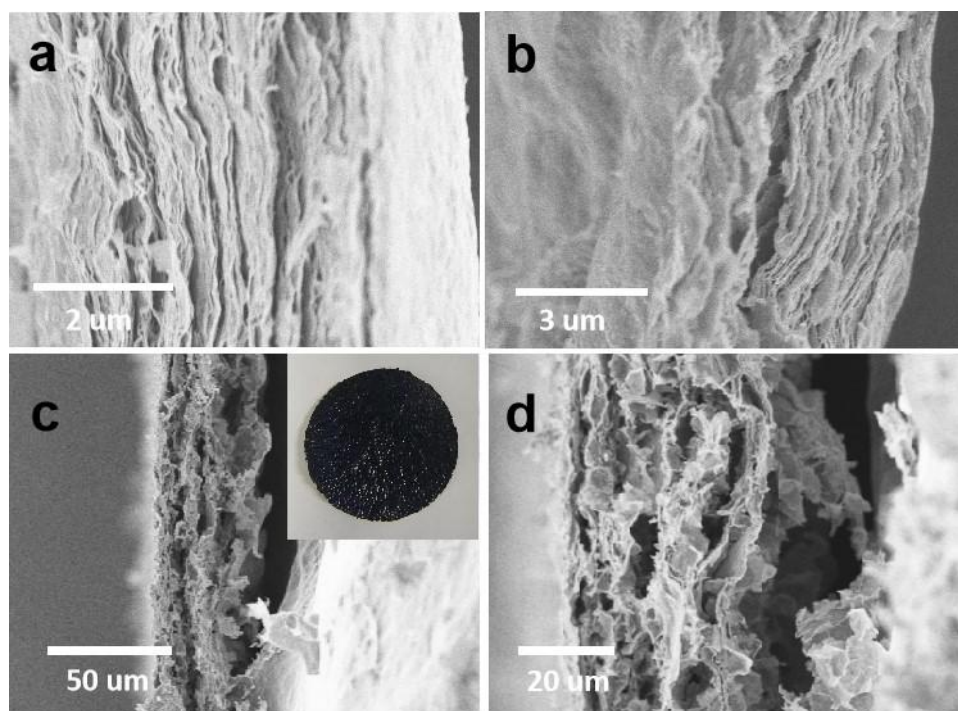

**Figure S4.** SEM cross-sectional images of (a) V-Ti<sub>3</sub>C<sub>2</sub>, (b) V-, N-Ti<sub>3</sub>C<sub>2</sub>, and (c-d) 3D V-, N-Ti<sub>3</sub>C<sub>2</sub> film. The inset is the optical figures of 3D V-, N-Ti<sub>3</sub>C<sub>2</sub> film.

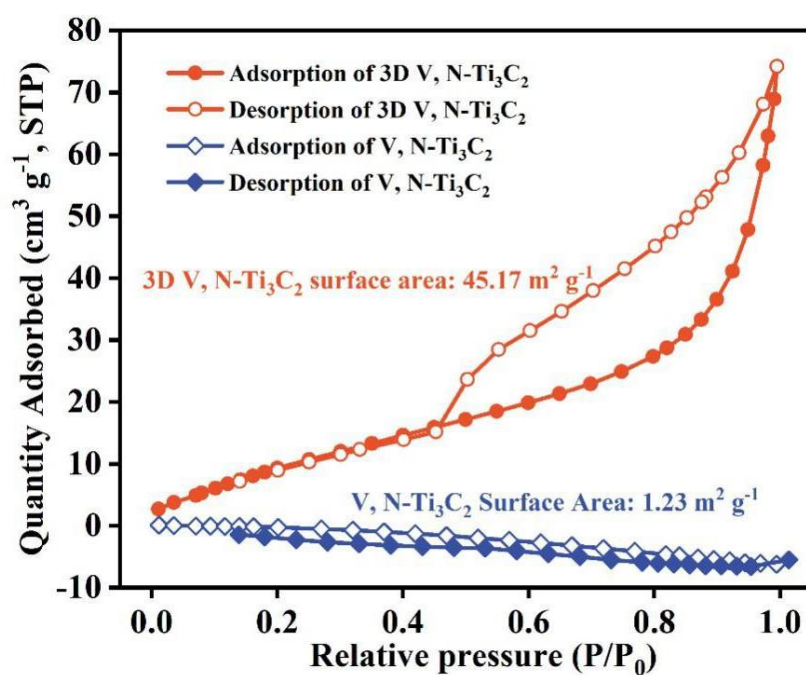

**Figure S5.** N<sub>2</sub> adsorption-desorption isotherms of 3D V-, N-Ti<sub>3</sub>C<sub>2</sub> and V-, N-Ti<sub>3</sub>C<sub>2</sub>.

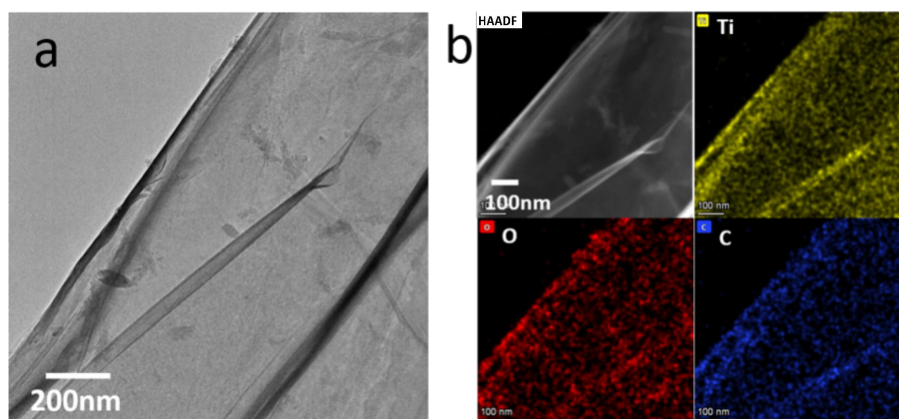

**Figure S6.** (a) TEM images of the 3D V-, N-Ti<sub>3</sub>C<sub>2</sub>, (b) EDX elemental mapping of Ti, O and C for the 3D V-, N-Ti<sub>3</sub>C<sub>2</sub>.

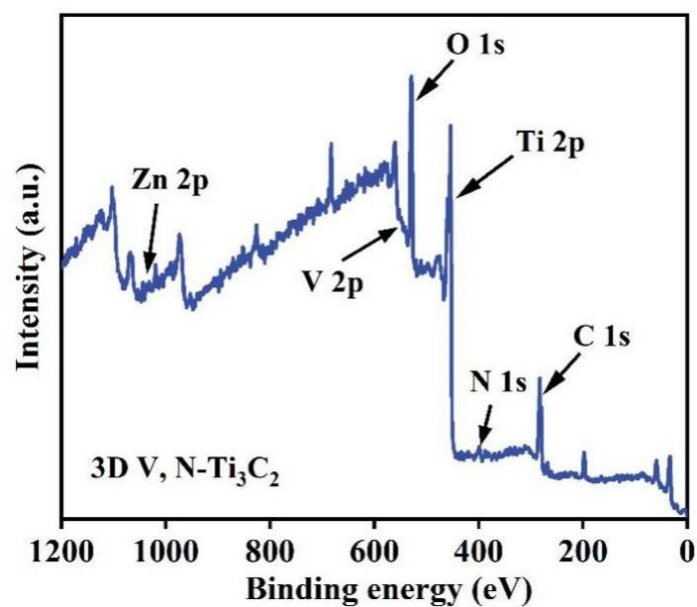

**Figure S7.** Survey XPS spectra of 3D V-, N-Ti<sub>3</sub>C<sub>2</sub> film.

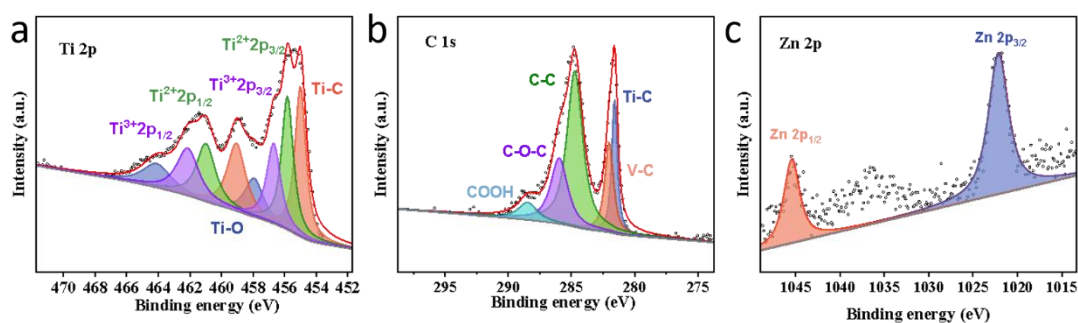

**Figure S8.** High-resolution XPS spectra of (a) Ti 2p, (b) C 1s, (c) Zn 2p for the 3D V-, N-Ti<sub>3</sub>C<sub>2</sub> film.

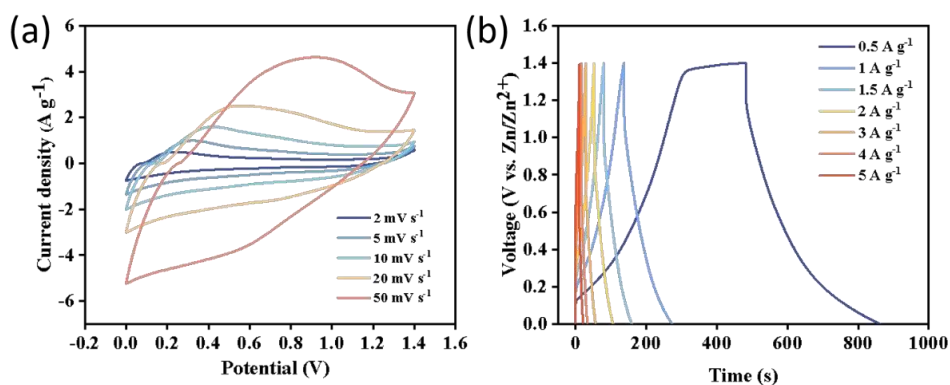

**Figure S9.** (a) CV curves and (b) galvanostatic charge/discharge profiles of the  $\text{Ti}_3\text{C}_2$  film.

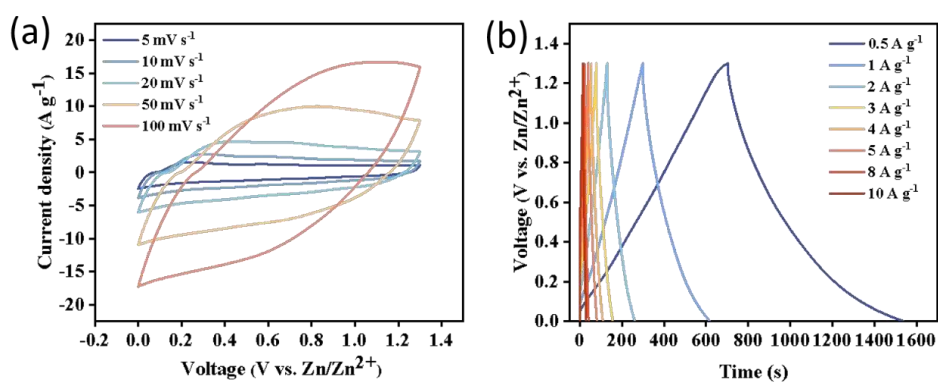

**Figure S10.** (a) CV curves and (b) galvanostatic charge/discharge profiles of the 3D  $\text{Ti}_3\text{C}_2$  film.

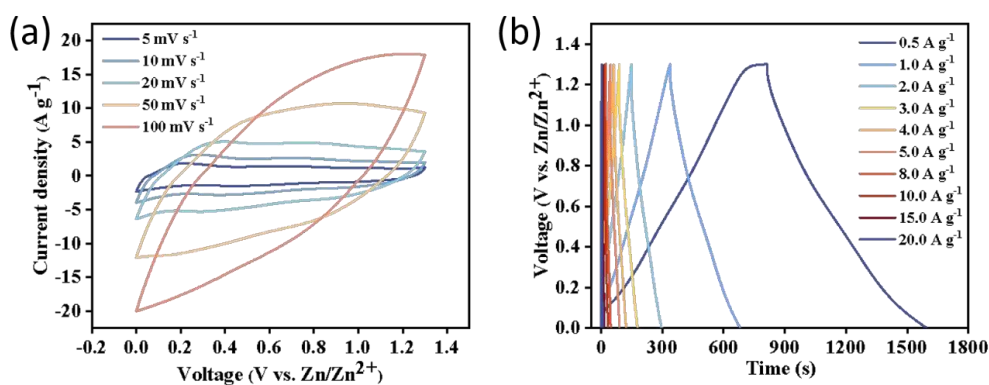

**Figure S11.** (a) CV curves and (b) galvanostatic charge/discharge profiles of the V- $\text{Ti}_3\text{C}_2$  film.



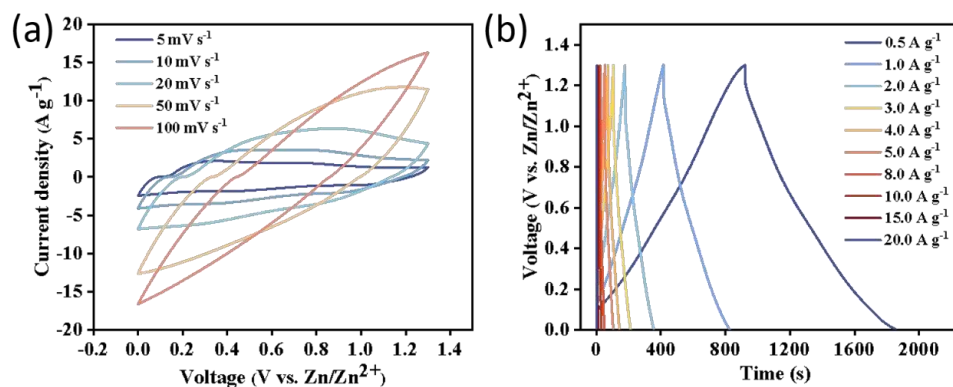

**Figure S12.** (a) CV curves and (b) galvanostatic charge/discharge profiles of the V-, N-Ti<sub>3</sub>C<sub>2</sub> film.

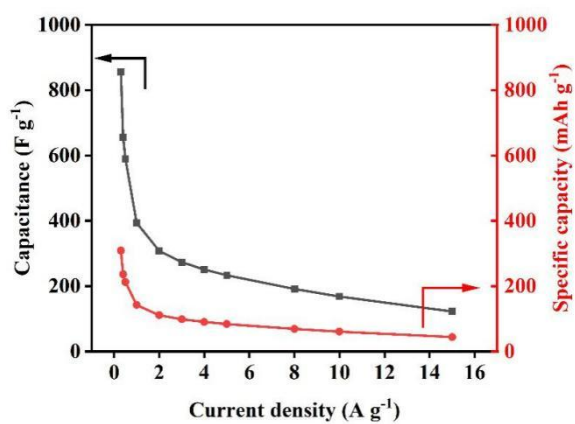

**Figure S13.** Specific capacity and specific capacitance of the 3D V-, N-Ti<sub>3</sub>C<sub>2</sub> film in 2M ZnSO<sub>4</sub>.

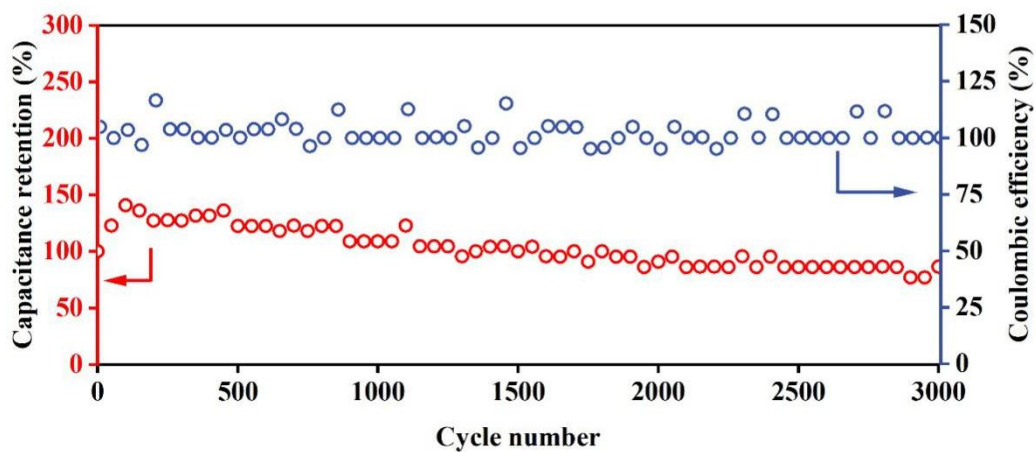

**Figure S14.** Cycling performance of the 3D V-, N-Ti<sub>3</sub>C<sub>2</sub>//Zn ZIC at 10 A g<sup>-1</sup>.

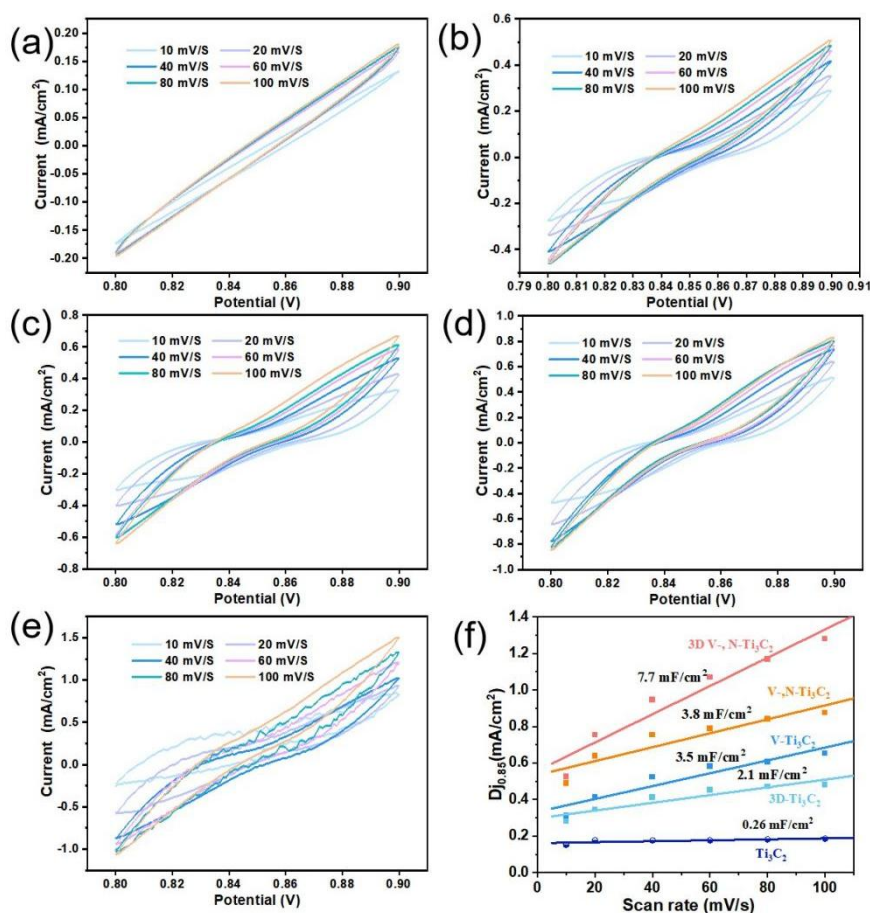

**Figure S15.** CV curves of the (a)  $\text{Ti}_3\text{C}_2$  film, (b) 3D  $\text{Ti}_3\text{C}_2$  film, (c) V- $\text{Ti}_3\text{C}_2$  film, (d) V-, N- $\text{Ti}_3\text{C}_2$  film, and (e) 3D V-, N- $\text{Ti}_3\text{C}_2$  film at different scanning rates, and (f) double-layer capacitance diagram of samples.

**Table S1.** Comparison of storage energy performances between this work and previously reported in the literature

| Cathode                 | Anode                       | Electrolyte               | Voltage (V) | Capacity  | Current density (A/g) | Energy density (Wh Kg <sup>-1</sup> ) | Ref. |
|-------------------------|-----------------------------|---------------------------|-------------|-----------|-----------------------|---------------------------------------|------|
| AC                      | 2D Zn                       | 1M ZnSO <sub>4</sub>      | 0.2-1.8     | 468 F/g   | 0.5                   | 208                                   | [S1] |
| AC                      | Zn                          | 2M ZnSO <sub>4</sub>      | 0-1.8       | 121 mAh/g | 0.1                   | 84                                    | [S2] |
| HNPC                    | Zn                          | 1M ZnSO <sub>4</sub>      | 0-1.8       | 177 mAh/g | 4.2                   | 107                                   | [S3] |
| N-HPC                   | Zn                          | 2M ZnSO <sub>4</sub>      | 0.2-1.8     | 136 mAh/g | 0.1                   | 191                                   | [S4] |
| $\text{Ti}_3\text{C}_2$ | Zn/ $\text{Ti}_3\text{C}_2$ | 1M ZnSO <sub>4</sub> /Gel | 0-1.35      | 132 F/g   | 0.5                   | --                                    | [S5] |



|                                                                       |           |                                                         |              |                              |            |            |                      |
|-----------------------------------------------------------------------|-----------|---------------------------------------------------------|--------------|------------------------------|------------|------------|----------------------|
| 3D porous<br>H-Ti <sub>3</sub> C <sub>2</sub> T <sub>x</sub><br>films | Zn        | 2M<br>Zn(CF <sub>3</sub> SO <sub>4</sub> ) <sub>2</sub> | 0-1.3        | 105 mAh/g                    | 0.2        | 53.6       | [S6]                 |
| G-PANI                                                                | Zn        | 2M ZnSO <sub>4</sub>                                    | 0.3-1.6      | 154 mAh/g                    | 0.1        | 205        | [S7]                 |
| <b>3D V-,<br/>N-Ti<sub>3</sub>C<sub>2</sub></b>                       | <b>Zn</b> | <b>2M ZnSO<sub>4</sub></b>                              | <b>0-1.3</b> | <b>309 mAh/g<br/>855 F/g</b> | <b>0.3</b> | <b>201</b> | <b>This<br/>work</b> |

## References:

- [S1] An, G. H.; Hong, J.; Pak, S.; Cho, Y.; Lee, S.; Hou, B.; Cha, S. 2D Metal Zn Nanostructure Electrodes for High-Performance Zn Ion Supercapacitors. *Adv. Energy Mater.* **2019**, *10* (3), 1902981
- [S2] Dong, L.; Ma, X.; Li, Y.; Zhao, L.; Liu, W.; Cheng, J.; Xu, C.; Li, B.; Yang, Q.-H.; Kang, F. Extremely safe, high-rate and ultralong-life zinc-ion hybrid supercapacitors. *Energy Storage Mater.* **2018**, *13*, 96-102.
- [S3] Zhang, H.; Liu, Q.; Fang, Y.; Teng, C.; Liu, X.; Fang, P.; Tong, Y.; Lu, X. Boosting Zn-ion energy storage capability of hierarchically porous carbon by promoting chemical adsorption. *Adv. Mater.* **2019**, *31* (44), e1904948.
- [S4] Liu, P.; Gao, Y.; Tan, Y.; Liu, W.; Huang, Y.; Yan, J.; Liu, K. Rational design of nitrogen doped hierarchical porous carbon for optimized zinc-ion hybrid supercapacitors. *Nano Res.* **2019**, *12* (11), 2835-2841.
- [S5] Yang, Q.; Huang, Z.; Li, X.; Liu, Z.; Li, H.; Liang, G.; Wang, D.; Huang, Q.; Zhang, S.; Chen, S.; Zhi, C. A wholly degradable, rechargeable Zn-Ti<sub>3</sub>C<sub>2</sub> MXene capacitor with superior anti-self-discharge function. *ACS Nano* **2019**, *13* (7), 8275-8283.

[S6] Li, F.; Liu, Y.-l.; Wang, G.-G.; Zhang, S.-Y.; Zhao, D.-Q.; Fang, K.; Zhang, H.-Y.;

Yang, H. Y. 3D porous H-Ti<sub>3</sub>C<sub>2</sub>T<sub>x</sub> films as free-standing electrodes for zinc ion hybrid capacitors. *Chem. Eng. J.* **2022**, *435*, 135052.

[S7] Han, J.; Wang, K.; Liu, W.; Li, C.; Sun, X.; Zhang, X.; An, Y.; Yi, S.; Ma, Y.

Rational design of nano-architecture composite hydrogel electrode towards high performance Zn-ion hybrid cell. *Nanoscale* **2018**, *10* (27), 13083-13091.
